# Supplementary material for: Accelerated DNA methylation age and the use of antihypertensive medication among older adults
Source: PubMed Central journal article supplement (PMC6286862; doi:10.18632/aging.101626), 2018-11-10
Supplement: aging-10-101626-s002.pdf [file aging-10-101626-s002.pdf]

**Table S2. Associations of clinical biomarkers with DNA methylation age, age accelerations and change rate of age acceleration<sup>a</sup>.**

|                                 | Biomarkers        | First visit        |         | Second visit       |         |
|---------------------------------|-------------------|--------------------|---------|--------------------|---------|
|                                 |                   | Coefficients (SE)  | p-value | Coefficients (SE)  | p-value |
| Age acceleration                | SBP               | 9.5 e-3 (0.014)    | 0.498   | -2.6 e-3 (0.016)   | 0.874   |
|                                 | DBP               | -0.011 (0.027)     | 0.690   | 0.012 (0.031)      | 0.706   |
|                                 | Fasting glucose   | 0.017(0.009)       | 0.058   | 0.005 (0.014)      | 0.713   |
|                                 | Total cholesterol | -2.6 e-3(6.6 e-3)  | 0.698   | -8.8 e-3 (7.5 e-3) | 0.243   |
|                                 | HDL               | -0.020 (0.019)     | 0.287   | -0.037 (0.023)     | 0.100   |
|                                 | Triglyceride      | 4.1 e-4 (3.4 e-3)  | 0.904   | -6.2 e-3 (5.1 e-3) | 0.227   |
|                                 | Uric acid         | 0.084 (0.168)      | 0.617   | -0.113 (0.205)     | 0.584   |
|                                 | Calcium           | 0.665 (0.648)      | 0.306   | -0.273 (0.823)     | 0.740   |
|                                 | Phosphorus        | -0.251 (0.545)     | 0.645   | -0.159 (0.625)     | 0.799   |
|                                 | Potassium         | 2.1 e-4 (2.2 e-4)  | 0.338   | -1.0 e-4 (2.4 e-4) | 0.684   |
|                                 | Zinc              | -0.024 (0.014)     | 0.100   | 0.010 (0.016)      | 0.527   |
|                                 | Magnesium         | 8.1 e-5 (1.9 e-3)  | 0.966   | -7.9 e-4 (2.1 e-3) | 0.706   |
|                                 | Sodium            | 7.2 e-5 (1.3 e-4)  | 0.587   | -1.4 e-4 (1.6 e-4) | 0.364   |
| Change rate of age acceleration | SBP               | 2.4 e-3 (3.4 e-3)  | 0.477   | 4.1 e-3 (3.6 e-3)  | 0.260   |
|                                 | DBP               | 1.9 e-3 (6.6 e-3)  | 0.773   | 0.011 (0.007)      | 0.102   |
|                                 | Fasting glucose   | -4.0 e-3 (2.2 e-3) | 0.067   | -9.8 e-4 (3.0 e-3) | 0.746   |
|                                 | Total cholesterol | 2.4 e-3 (1.6 e-3)  | 0.146   | 2.3 e-3 (1.7 e-3)  | 0.175   |
|                                 | HDL               | 1.5 e-3 (4.6 e-3)  | 0.745   | 2.9 e-3 (5.0 e-3)  | 0.566   |
|                                 | Triglyceride      | 5.0 e-4 (8.3 e-4)  | 0.552   | -9.1 e-4 (1.1 e-3) | 0.423   |
|                                 | Uric acid         | -4.2 e-3 (0.041)   | 0.919   | -0.049 (0.048)     | 0.307   |
|                                 | Calcium           | 0.116 (0.160)      | 0.469   | -0.078 (0.190)     | 0.684   |
|                                 | Phosphorus        | -0.181 (0.134)     | 0.178   | -0.106 (0.144)     | 0.462   |
|                                 | Potassium         | 1.1 e-5 (5.4 e-5)  | 0.845   | -5.0 e-5 (5.2 e-5) | 0.353   |
|                                 | Zinc              | 6.0 e-3 (3.6 e-3)  | 0.092   | 3.8 e-3 (3.6 e-3)  | 0.286   |
|                                 | Magnesium         | 1.7 e-4 (4.7 e-4)  | 0.715   | -6.1 e-4 (4.6 e-4) | 0.184   |
|                                 | Sodium            | -9.5 e-6 (3.3 e-5) | 0.771   | -7.0 e-5 (3.4 e-5) | 0.055   |

a: Model adjusted for corresponding covariates at each visit: age, BMI, alcohol, smoking, years of education, physical activity and leucocyte distribution (Houseman algorithm). Age acceleration was additionally adjusted for in the model for the change rate of age acceleration.
