# Supplementary material for: Accelerated DNA methylation age and the use of antihypertensive medication among older adults
Source: Aging (Albany NY). 2018 Nov 10;10(11):3210–28. doi: 10.18632/aging.101626 (PMC6286862; doi:10.18632/aging.101626)
Supplement: Supplementary Table S1 [file aging-10-101626-s001.pdf]

**Table S1. Associations of hypertension, diabetes and metabolic syndrome with DNA methylation age, age acceleration and change rate of age acceleration <sup>a</sup>.**

|                                 | Health outcomes    | Status at first visit | N   | Coefficients (SE) | p-value | Status at second visit | N   | Coefficients (SE) | p-value |
|---------------------------------|--------------------|-----------------------|-----|-------------------|---------|------------------------|-----|-------------------|---------|
| Age acceleration                | Hypertension       | No                    | 172 | Ref               |         | No                     | 135 | Ref               |         |
|                                 |                    | Yes                   | 374 | 0.041 (0.543)     | 0.940   | Yes                    | 411 | 0.326 (0.703)     | 0.644   |
|                                 | Diabetes           | No                    | 479 | Ref               |         | No                     | 457 | Ref               |         |
|                                 |                    | Yes                   | 67  | 0.783 (0.728)     | 0.283   | Yes                    | 89  | 0.431 (0.804)     | 0.592   |
|                                 | Metabolic syndrome | No                    | 265 | Ref               |         | No                     | 249 | Ref               |         |
|                                 |                    | Yes                   | 281 | 0.867 (0.527)     | 0.101   | Yes                    | 297 | 0.847 (0.644)     | 0.683   |
| Change rate of age acceleration | Hypertension       | No                    | 172 | Ref               |         | No                     | 135 | Ref               |         |
|                                 |                    | Yes                   | 374 | 0.144 (0.129)     | 0.267   | Yes                    | 411 | 0.219 (0.137)     | 0.111   |
|                                 | Diabetes           | No                    | 479 | Ref               |         | No                     | 457 | Ref               |         |
|                                 |                    | Yes                   | 67  | 0.419 (0.174)     | 0.016   | Yes                    | 89  | 0.361 (0.156)     | 0.021   |
|                                 | Metabolic syndrome | No                    | 265 | Ref               |         | No                     | 249 | Ref               |         |
|                                 |                    | Yes                   | 281 | 0.171 (0.126)     | 0.176   | Yes                    | 297 | 0.343 (0.124)     | 0.061   |

a: Model adjusted for corresponding covariates at each visit: age, BMI, alcohol consumption, smoking, years of education, physical activity, leucocyte distribution (Houseman algorithm) and the random batch effect of DNA methylation measurement. Age acceleration was additionally adjusted for in the model for the change rate of age acceleration.
