# Supplementary material for: Accelerated DNA methylation age and the use of antihypertensive medication among older adults
Source: Aging (Albany NY). 2018 Nov 10;10(11):3210–28. doi: 10.18632/aging.101626 (PMC6286862; doi:10.18632/aging.101626)
Supplement: Supplementary Table S3 [file aging-10-101626-s003.pdf]

**Table S3. Sensitivity analyses: associations of any antihypertensive medication use with age acceleration and change rate of age acceleration for Hannum DNA methylation age and DNA methylation Phenotypic age.**

**a. Cross-sectional associations with age acceleration and change rate of age acceleration.**

| Visit               | Types of aging biomarkers      | Use of any antihypertension medication | N   | Age acceleration     |         |                      |         | Change rate of age acceleration |         |                   |         |
|---------------------|--------------------------------|----------------------------------------|-----|----------------------|---------|----------------------|---------|---------------------------------|---------|-------------------|---------|
|                     |                                |                                        |     | Model 1 <sup>a</sup> |         | Model 2 <sup>b</sup> |         | Model 1                         |         | Model 2           |         |
|                     |                                |                                        |     | Coefficients (SE)    | p-value | Coefficients (SE)    | p-value | Coefficients (SE)               | p-value | Coefficients (SE) | p-value |
| <b>First visit</b>  | DNA methylation age (Hannum)   | No                                     | 233 | Ref                  |         | Ref                  |         | Ref                             |         | Ref               |         |
|                     |                                | Yes                                    | 313 | 0.899 (0.406)        | 0.014   | 2.150 (0.727)        | 0.003   | 0.050 (0.073)                   | 0.489   | 0.137 (0.112)     | 0.383   |
|                     | DNA methylation Phenotypic age | No                                     | 233 | Ref                  |         | Ref                  |         | Ref                             |         | Ref               |         |
|                     |                                | Yes                                    | 313 | 1.406 (0.568)        | 0.0001  | 1.687 (0.999)        | 0.002   | 0.038 (0.108)                   | 0.731   | 0.037 (0.198)     | 0.854   |
| <b>Second visit</b> | DNA methylation age (Hannum)   | No                                     | 163 | Ref                  |         | Ref                  |         | Ref                             |         | Ref               |         |
|                     |                                | Yes                                    | 383 | 0.925 (0.445)        | 0.113   | 1.801 (0.992)        | 0.153   | 0.016 (0.075)                   | 0.832   | 0.015 (0.153)     | 0.920   |
|                     | DNA methylation Phenotypic age | No                                     | 163 | Ref                  |         | Ref                  |         | Ref                             |         | Ref               |         |
|                     |                                | Yes                                    | 383 | 1.732 (0.573)        | 0.003   | 1.692 (1.340)        | 0.087   | 0.091 (0.116)                   | 0.435   | 0.221 (0.238)     | 0.355   |

a: Model 1: Adjusted for covariates at each visit: age + leukocyte distribution (Houseman algorithm) + random effect (batch effect of DNA methylation measurement). Age acceleration was additionally adjusted for in the model for the change rate of age acceleration;

b: Model 2: Model 1 + BMI + smoking status + alcohol consumption + physical activity + years of education + total cholesterol + HDL + triglycerides + fasting glucose + SBP + hypertension + stroke + CHD + diabetes + cancer.

**b. Longitudinal associations with change rate of age acceleration.**

| Types of aging biomarkers      | Change of any antihypertension medication use | N   | Change rate of age acceleration |         |                      |         |
|--------------------------------|-----------------------------------------------|-----|---------------------------------|---------|----------------------|---------|
|                                |                                               |     | Model 1 <sup>a</sup>            |         | Model 2 <sup>b</sup> |         |
|                                |                                               |     | Coefficients (SE)               | p-value | Coefficients (SE)    | p-value |
| DNA methylation age (Hannum)   | Never used                                    | 150 | Ref                             |         | Ref                  |         |
|                                | Stopped use after first visit                 | 13  | -0.789 (0.241)                  | 0.001   | -0.861 (0.287)       | 0.003   |
|                                | Started use after first visit                 | 83  | 0.055 (0.109)                   | 0.614   | 0.039 (0.123)        | 0.753   |
|                                | Continuous use                                | 300 | 0.139 (0.112)                   | 0.187   | 0.151 (0.148)        | 0.199   |
| DNA methylation Phenotypic age | Never used                                    | 150 | Ref                             |         | Ref                  |         |
|                                | Stopped use after first visit                 | 13  | -0.516 (0.355)                  | 0.147   | -0.540 (0.412)       | 0.191   |
|                                | Started use after first visit                 | 83  | 0.159 (0.162)                   | 0.325   | 0.116 (0.178)        | 0.517   |
|                                | Continuous use                                | 300 | 0.187 (0.124)                   | 0.227   | 0.146 (0.215)        | 0.130   |

a: Model 1: Adjusted for: age (first visit) + age acceleration (first visit) + leukocyte distribution (first visit, Houseman algorithm) + random effect (batch effect of methylation measurement at first visit);

b: Model 2: Model 1 + BMI (first visit) + smoking status (first visit) + alcohol consumption (first visit) + physical activity (first visit) + years of education (first visit) + total cholesterol (first visit) + HDL (first visit) + triglycerides (first visit) + fasting glucose (first visit) + SBP (first visit) + hypertension (first visit) + stroke (first visit) + CHD (first visit) + diabetes (first visit) + cancer (first visit).
